# Supplementary material for: Quality of clinical practice guidelines for inadequate response to first-line treatment for depression according to AGREE II checklist and comparison of recommendations: a systematic review
Source: HighWire-hosted journal article supplement (doi:10.1136/bmjopen-2021-051918), 2022-04-01
Supplement: bmjopen-2021-051918supp001_data_supplement.pdf [file bmjopen-2021-051918supp001_data_supplement.pdf]

---

## Appendix 1. Systematic search strategies

Medline (PubMed website)

---

((("Guideline"[Publication Type] OR Guideline as Topic"[Mesh] OR 'Practice Guideline'[Publication Type] OR 'Health Planes Guidelines'[Mesh]) OR 'Clinical Protocols'[Mesh])) OR ('Consensus Development Conference, NIH"[Publication Type] OR 'Consensus Development Conference, NIH"[Publication Type] OR ('Consensus'[Mesh]))) OR Standard of Care[Mesh] "Guideline" Publication Type] OR 'Guideline as Topic'[Mesh] OR 'Practice Guideline'[Publication Type] OR 'Health Planes Guidelines'[Mesh] OR 'Clinical Protocols'[Mesh])) OR ('Consensus Development Conference, NIH"[Publication Type] OR 'Consensus Development Conference, NIH"[Publication Type] OR ('Consensus'[Mesh]))) OR Standard of Care[Mesh])) AND ((Depressive Disorder [Mesh] AND Depressive Disorder, Major [Mesh] OR Depressive Disorders OR disorder, Depressive OR Disorders, Depressive OR Neurosis, Depressives OR Depressive Neuroses OR Depressive Neurosis OR Neuroses, Depressive OR Depressions, Endogenous OR Endogenous Depression OR Endogenous Depressions OR Depressive Syndrome OR Depressive Syndromes OR Syndrome, Depressive OR Syndromes, Depressive OR depression, Neurotic OR Depressions, Neurotic OR Neurotic depression OR Neurotic Depressions OR Melancholia OR Melancholias OR Unipolar Depression OR Depression, Unipolar OR Depressions, Unipolar OR Unipolar Depressions)))

---

Cochrane

- # 1 MeSH descriptor: [Guideline] explode all trees
- # 2 MeSH descriptor: [Consensus] explode all trees
- # 3 MeSH descriptor: [Clinical Protocols] explode all trees
- # 4 #1 OR #2 OR #3
- # 5 MeSH descriptor: [Depression] explode all trees
- # 6 #4 AND #5

Embase

---

((practice guideline/mj OR 'consensus development'/exp/mj OR 'clinical protocol'/mj AND ('depression'/exp) AND (2011:py OR 2012:py OR 2013:py OR 2014:py OR 2015:py OR 2016:py AND [embase]/lim)

---

## Appendix 2. Reasons for excluding clinical practice guideline (CPG)

| Reference of the excluded CPG                                                                                                                                                                                                                                                                     | Reasons for exclusion |
|---------------------------------------------------------------------------------------------------------------------------------------------------------------------------------------------------------------------------------------------------------------------------------------------------|-----------------------|
| Institute for Clinical Systems Improvement. Adult Depression in Primary Care. Bloomington, MN: ICSI; 2016.                                                                                                                                                                                        | Duplicate             |
| Austin M-P, Hight N, The Expert Working Group. Mental Health Care in the Perinatal Period: Australian Clinical Practice Guideline. Melbourne, Australia: Centre of Perinatal Excellence; 2017.                                                                                                    | Duplicate             |
| Grinspun, D, Bajnok I, Rey M. Delirium, Dementia, and Depression in Older Adults: Assessment and Care. Toronto, Canada: Registered Nurses' Association of Ontario; 2016.                                                                                                                          | Duplicate             |
| National Guideline Clearinghouse. Delirium, Dementia, and Depression in Older Adults: Assessment and Care. Rockville, MD: Agency for Healthcare Research and Quality (AHRQ); 2016. Available from: <a href="https://www.guideline.gov">https://www.guideline.gov</a> . Accessed January 19, 2017. | Duplicate             |
| National Institute for Health and Care Excellence. Depression in Adults: Recognition and Management. 2009. Available from: <a href="https://www.nice.org.uk/guidance/cg90/evidence">https://www.nice.org.uk/guidance/cg90/evidence</a> . Accessed June 30, 2017.                                  | Duplicate             |
| Boltz M (Ed.). Evidence-based Geriatric Nursing Protocols for Best Practice. New York, NY: Springer; 2012.                                                                                                                                                                                        | Duplicate             |
| Depression. University of Michigan Health System. NGC:008672.                                                                                                                                                                                                                                     | Duplicate             |
| Álvarez Ariza M, Atienza Merino G, Ávila González MJ, et al. GPC sobre el Manejo de la Depresión en el Adulto. Madrid, Spain: Ministerio de Sanidad, Servicios Sociales e Igualdad; 2014.                                                                                                         | Duplicate             |
| National Guideline Clearinghouse. Depression (Singapore). Rockville, MD: Agency for Healthcare Research and Quality (AHRQ); 2012. Available from <a href="https://www.guideline.gov/summaries/summary/39324">https://www.guideline.gov/summaries/summary/39324</a> . Accessed October 19, 2016.   | Duplicate             |
| Austin M-P, Hight N, The Expert Working Group. Mental Health Care in the Perinatal Period: Australian Clinical Practice Guideline. Melbourne, Australia: Centre of Perinatal Excellence; 2017.                                                                                                    | Duplicate             |

|                                                                                                                                                                                                                                                                       |                                   |
|-----------------------------------------------------------------------------------------------------------------------------------------------------------------------------------------------------------------------------------------------------------------------|-----------------------------------|
| McDermott B, Baigent M, Chanen A, et al. Clinical Practice Guidelines: Depression in Adolescents and Young Adults. Melbourne, Australia: Agency for Healthcare Research and Quality; 2010.                                                                            | Duplicate                         |
| Michigan Quality Improvement Consortium Guideline. Primary Care Diagnosis and Management of Adults with Depression. Detroit, MI: MQIC; 2018. Available from: <a href="http://mqic.org/guidelines.htm">http://mqic.org/guidelines.htm</a> . Accessed October 19, 2016. | Duplicate                         |
| National Institute for Health and Clinical Excellence. Depression in Children and Young People: Identification and Management in Primary, Community and Secondary Care. Leicester, UK: British Psychological Society; 2005.                                           | Duplicate                         |
| Michigan Quality Improvement Consortium Guideline. Primary Care Diagnosis and Management of Adults with Depression. Detroit, MI: MQIC; 2018. Available from: <a href="http://mqic.org/guidelines.htm">http://mqic.org/guidelines.htm</a> . Accessed October 19, 2016. | Duplicate                         |
| Connolly KR, Thase ME. If at first you don't succeed: a review of the evidence for antidepressant augmentation, combination and switching strategies. <i>Drugs</i> 2011;71(1):43-64. doi:10.2165/11587620-000000000-00000.                                            | Duplicate                         |
| National Institute for Health and Care Excellence. Common Mental Health Disorders. Identification and Pathways to Care. London, UK: NICE; 2011.                                                                                                                       | Without pharmacological treatment |
| Grinspun, D, Bajnok I, Rey M. Delirium, Dementia, and Depression in Older Adults: Assessment and Care. Toronto, Canada: Registered Nurses' Association of Ontario; 2016.                                                                                              | Duplicate                         |
| Joffres M, Jaramillo A, Dickinson J, et al. Recommendations on screening for depression in adults. <i>CMAJ</i> 2013;185(9):775-82. doi:10.1503/cmaj.130403.                                                                                                           | Without pharmacological treatment |
| Boltz M (Ed.). Evidence-based Geriatric Nursing Protocols for Best Practice. New York, NY: Springer; 2012.                                                                                                                                                            | Duplicate                         |
| Patten SB. Updated CANMAT guidelines for treatment of major depressive disorder. <i>Can J Psychiatry</i> 2016; 61(9):504-5. doi:10.1177/0706743716660034.                                                                                                             | Without pharmacological treatment |
| Rush AJ, Aaronson ST, Demyttenaere K. Difficult-to-treat depression: a clinical and research roadmap for when remission is elusive. <i>Aust N Z J Psychiatry</i> 2019;53(2):109-18. doi:10.1177/0004867418808585.                                                     | Without pharmacological treatment |
| Frye MA. Clinical practice: bipolar disorder--a focus on depression. <i>N Engl J Med</i> 2011;364(1):51-9.                                                                                                                                                            | Focused on special groups         |

|                                                                                                                                                                                                                                                                                                                                                                                                                                                                                         |                |
|-----------------------------------------------------------------------------------------------------------------------------------------------------------------------------------------------------------------------------------------------------------------------------------------------------------------------------------------------------------------------------------------------------------------------------------------------------------------------------------------|----------------|
| Malhi GS, Bassett D, Boyce P, et al. Royal Australian and New Zealand College of Psychiatrists clinical practice guidelines for mood disorders. <i>Aust N Z J Psychiatry</i> 2015;49(12):1087-206. doi:10.1177/0004867415617657.                                                                                                                                                                                                                                                        | Duplicate      |
| Andersen BL, DeRubeis RJ, Berman BS, et al. Screening, assessment, and care of anxiety and depressive symptoms in adults with cancer: an American Society of Clinical Oncology guideline adaptation. <i>J Clin Oncol</i> 2014;32(15):1605-19. doi:10.1200/JCO.2013.52.4611.                                                                                                                                                                                                             | Subject matter |
| American Medical Directors Association. Guideline Summary: Depression in the Long Term Care Setting. Columbia, MD: AMDA; 2011.                                                                                                                                                                                                                                                                                                                                                          | Subject matter |
| Joffres M, Jaramillo A, Dickinson J, et al. Recommendations on screening for depression in adults. <i>CMAJ</i> 2013;185(9):775-82. doi:10.1503/cmaj.130403.                                                                                                                                                                                                                                                                                                                             | Subject matter |
| Li M, Kennedy EB, Byrne N, et al. The management of depression in patients with cancer: a clinical practice guide. <i>J OncolPract</i> 2016;12(8):747-56. doi:10.1200/JOP.2016.011072.                                                                                                                                                                                                                                                                                                  | Subject matter |
| Ostacher MJ, Tandon R, Suppes T. Florida best practice psychotherapeutic medication guidelines for adults with bipolar disorder: a novel, practical, patient-centered guide for clinicians. <i>J Clin Psychiatry</i> 2016;77(7):920-6. doi:10.4088/JCP.15cs09841. Available in: <a href="http://www.embase.com/search/results?subaction=viewrecord&amp;from=export&amp;id=L611538719">http://www.embase.com/search/results?subaction=viewrecord&amp;from=export&amp;id=L611538719</a> . | Subject matter |
| Pfennig A, Bschor T, Falkai P, et al. The diagnosis and treatment of bipolar disorder: recommendations from the current S3 guideline. <i>Dtsch Arztebl Int</i> 110(6):92-100. doi:10.3238/arztebl.2013.0092.                                                                                                                                                                                                                                                                            | Subject matter |
| Rosenblat JD, McIntyre RS. Treatment recommendations for DSM-5-defined mixed features. <i>CNS Spectr</i> 2017;22(2):147-54. doi:10.1017/S1092852916000432.                                                                                                                                                                                                                                                                                                                              | Subject matter |
| Alexopoulos GS. Pharmacotherapy for late-life depression. <i>J Clin Psychiatry</i> 2011;72(1):e04. doi:10.4088/JCP.7085tx2cj.                                                                                                                                                                                                                                                                                                                                                           | Not a CPG      |
| Andresescu C, Reynolds CF III. Late-life depression: evidencebased treatment and promising new directions for research and clinical practice. <i>Psychiatr Clin North Am</i> 2011;34(2):335-55. doi:10.1016/j.psc.2011.02.005.                                                                                                                                                                                                                                                          | Not a CPG      |
| Arnow BA, Steidtmann D, Blasey C, et al. The relationship between the therapeutic alliance and treatment outcome in                                                                                                                                                                                                                                                                                                                                                                     | Not a CPG      |

|                                                                                                                                                                                                                                                                      |           |
|----------------------------------------------------------------------------------------------------------------------------------------------------------------------------------------------------------------------------------------------------------------------|-----------|
| two distinct psychotherapies for chronic depression. <i>J Consult Clin Psychol</i> 2013; 81(4):627-38. doi:10.1037/a0031530.                                                                                                                                         |           |
| Ayub-Dargél A, Masson M, Henry C. The RANZCP guidelines: managing mood disorders in the real world. <i>Aust N Z J Psychiatry</i> 2016;50(12): 1198-9. doi:10.1177/0004867416676373.                                                                                  | Not a CPG |
| Bland P. Raising standards of care for patients with depression. <i>Practitioner</i> 2011;255(1740):21-5.                                                                                                                                                            | Not a CPG |
| Boffin N, Bossuyt N, Declercq T, et al. Incidence, patient characteristics and treatment initiated for GP-diagnosed depression in general practice: results of a 1-year nationwide surveillance study. <i>Fam Prac</i> 2012;29(6):678-87. doi:10.1093/fampra/cms024. | Not a CPG |
| Bohra HM, Novak M. Depression in patients with chronic kidney disease. <i>CANNT J</i> 2015;25(3):34-8.                                                                                                                                                               | Not a CPG |
| Busch FN, Sandberg LS. Combined treatment of depression. <i>Psychiatr Clin North Am</i> 2012;35(1):165-79. doi:10.1016/j.psc.2011.10.002.                                                                                                                            | Not a CPG |
| Cohen A. The QOF, NICE, and depression. <i>Br J Gen Pract</i> 2011;61(590):549. doi:10.3399/bjgp11X593785.                                                                                                                                                           | Not a CPG |
| Baumann S, Benson-Martin J, Cossie Q, et al. SASOP treatment guidelines for psychiatric disorders: eminence or evidence based? <i>S Afr J Psychiatr</i> 2019;20(2):a529. doi:10.4102/sajpsychiatry.v20i2.529.                                                        | Not a CPG |
| Cosgrove L, Shaughnessy AF, Wheeler EE, et al. The American Psychiatric Association's guideline for major depressive disorder: a commentary. <i>Psychother Psychosom</i> 2012;81(3):186-8. doi:10.1159/000335523.                                                    | Not a CPG |
| Cuijpers P. Effective therapies or effective mechanisms in treatment guidelines for depression? <i>Depress Anxiety</i> 2013;30(11):1055-7. doi:10.1002/da.22205.                                                                                                     | Not a CPG |
| Cuijpers P. Combined pharmacotherapy and psychotherapy in the treatment of mild to moderate major depression? <i>JAMA Psychiatry</i> 2014;71(7):747-8. doi:10.1001/jamapsychiatry.2014.277.                                                                          | Not a CPG |
| De Coteau PA, Byrne CD, Russell, V. The HSE/ICGP guidelines on the management of depression and anxiety disorders in primary care. <i>Ir Med J</i> 2012;105(7):251.                                                                                                  | Not a CPG |
| Desseilles M, Witte J, Chang TE, et al. Assessing the adequacy of past antidepressant trials: a clinician's guide to                                                                                                                                                 | Not a CPG |

|                                                                                                                                                                                                                                                               |           |
|---------------------------------------------------------------------------------------------------------------------------------------------------------------------------------------------------------------------------------------------------------------|-----------|
| the antidepressant treatment response questionnaire. <i>J Clin Psychiatry</i> 2011;72(8):1152-4. doi:10.4088/JCP.11ac07225.                                                                                                                                   |           |
| Canadian Agency for Drugs and Technologies in Health. Diagnosing, Screening, and Monitoring Depression in the Elderly: A Review of Guidelines. Ottawa, ON: CADTH; 2015.                                                                                       | Not a CPG |
| Canadian Agency for Drugs and Technologies in Health. Antidepressants in Elderly Patients with Major and Minor Depression: A Review of Clinical Effectiveness and Guidelines. Ottawa, ON: CADTH; 2015.                                                        | Not a CPG |
| Gensichen J, Harter M, Klesse C, et al. Germany's national clinical practice guideline (S3) for unipolar depression—What is important for family practice? <i>ZFA</i> 2011;87(5):223-30. doi:10.3238/zfa.2011.0223.                                           | Not a CPG |
| Geoffroy PA, Bellivier F. The RANZCP mood disorders guidelines: an easy step-by-step toolbox for daily practice. <i>Aust N Z J Psychiatry</i> 2016;50(10):1014-5. doi:10.1177/0004867416667829.                                                               | Not a CPG |
| Gitlin M. The Royal Australian and New Zealand College of Psychiatrists clinical guidelines for mood disorders: kudos and quarrels. <i>Aust NZ Psychiatry</i> 2016;50(10):937-8. doi:10.1177/0004867416668038                                                 | Not a CPG |
| Grobler, G. An overview of depression treatment guidelines. Abstracts 2nd African College of Neuropsychopharmacology Congress 30-31 July 2016 Stellenbosch, Western Cape, South Africa. <i>Acta Neuropsychiatr</i> 2016;28(s3):1-15. doi:10.1017/neu.2016.37. | Not a CPG |
| Heilmann KE, Wagner M, Riedel-Heller S, et al. Treating late life depression with antidepressants: a summary of recommendations in international guidelines. <i>Fortschr Neurol Psychiatr</i> 2015;83(7):381-91. doi:10.1055/s-0035-1553315.                  | Not a CPG |
| Horgan D, Dodd S. Combination antidepressants—use by GPs and psychiatrists. <i>Aust Fam Physician</i> 2011;40(6):397-400.                                                                                                                                     | Not a CPG |
| Kasper S. Editorial. <i>World J Biol Psychiatry</i> 2013;14(5):333. doi:10.3109/15622975.2013.819703.                                                                                                                                                         | Not a CPG |
| Kendall T, Pilling S, Glover N, et al. Guidelines in mental health - national and international perspectives. <i>Int Rev Psychiatry</i> 2011;23(4):314-7. doi:10.3109/09540261.2011.607431.                                                                   | Not a CPG |

|                                                                                                                                                                                                                  |           |
|------------------------------------------------------------------------------------------------------------------------------------------------------------------------------------------------------------------|-----------|
| Kongsuk T. Clinical practice guideline major depressive disorder for general practitioners. <i>Value Health</i> 2013;16(7):A695. doi:10.1016/j.jval.2013.08.2091.                                                | Not a CPG |
| Kurian BT, Grannemann B, Trivedi MH. Feasible evidencebased strategies to manage depression in primary care. <i>Curr Psychiatr Rep</i> 2012;14(4):370-5. doi:10.1007/s11920-0120290-y.                           | Not a CPG |
| Laux G. Update treatment of depression—S3 Guideline, internet- based psychotherapy, antidepressants and driving ability. <i>Nervenheilkunde</i> 2016;35(10):691-6. doi:10.1055/s-0037- 1616433.                  | Not a CPG |
| Leadholm AKK, Rothschild AJ, Nolen WA et al. The treatment of psychotic depression: is there consensus among guidelines and psychiatrists? <i>J Affect Disord</i> 145(2): 214-20. doi:10.1016/j.jad.2012.07.036. | Not a CPG |
| Malhi G, Oakley-Browne M, Hay P. Clinical practice guidelines project (CPG project) overview. <i>Aust NZ J Psychiatr</i> 2015;49(Supp 1):30. doi:10.1177/0004867415578344.                                       | Not a CPG |
| Manning JS, Jackson WC. Providing guideline-concordant assessment and monitoring for major depression in primary care. <i>J Clin Psychiatry</i> 2015;76(1):e3. doi:10.4088/JCP.13013tx7c.                        | Not a CPG |
| Mathys M, Mitchell BG. Targeting treatment-resistant depression. <i>J Pharm Pract</i> 2011;24(6):520-33. doi:10.1177/0897190011426972.                                                                           | Not a CPG |
| Morris DW, Trivedi MH. Measurement-based care for unipolar depression. <i>Curr Psychiatry Rep</i> 2011;13(6):446-58. doi:10.1007/s11920-011-0237-8.                                                              | Not a CPG |
| Nelson JC. Foreword. <i>CNS Drugs</i> 2013;27:3-4. doi:10.1007/s40263-012-0027-9.                                                                                                                                | Not a CPG |
| Nutt DJ. Highlights of the international consensus statement on major depressive disorder. <i>J Clin Psychiatry</i> 2011;72(6):e21. doi:10.4088/JCP.9058tx2c.                                                    | Not a CPG |
| Ogasawara K, Ozaki N. Review of the new treatment guideline for major depressive disorder by the Japanese Society of Mood Disorders. <i>Brain Nerve</i> 2012;64(10):1159-65. In Japanese.                        | Not a CPG |
| Oldham J. Fine-tuning our treatment strategies. <i>J Psychiatr Pract</i> 2011;17(3):157.                                                                                                                         | Not a CPG |

|                                                                                                                                                                                                                                                 |           |
|-------------------------------------------------------------------------------------------------------------------------------------------------------------------------------------------------------------------------------------------------|-----------|
| doi:10.1097/01.pra.0000398408.13750.8d.                                                                                                                                                                                                         |           |
| Pai N. Are the Royal Australian and New Zealand College of Psychiatrists clinical practice guidelines for mood disorders meeting the needs of clinicians? <i>Aust N Z J Psychiatry</i> 2016;50(10):1015-6. doi:10.1177/0004867416667828.        | Not a CPG |
| Patkar AA, Pae C-U. Atypical antipsychotic augmentation strategies in the context of guideline-based care for the treatment of major depressive disorder. <i>CNS Drugs</i> 2013;27(Suppl 1):S29-S37. doi:10.1007/s40263-012-0031-0.             | Not a CPG |
| Rawlins M. Ten years of NICE mental health guidelines. <i>Int Rev Psychiatry</i> 2011;23(4):311-3. doi:10.3109/09540261.2011.606804.                                                                                                            | Not a CPG |
| Reisdorf S. Revision of the national health care guidelines on unipolar depression. <i>MedMonatss Pharm</i> 2016;39(4):171-2.                                                                                                                   | Not a CPG |
| Roberge P, Fournier L, Brouillet H, et al. A provincial adaptation of clinical practice guidelines for depression in primary care: a case illustration of the ADAPTE method. <i>J Eval Clin Pract</i> 2015;21(6):1190-8. doi:10.1111/jep.12404. | Not a CPG |
| Schuklenk U, Vathorst SVD. Treatment-resistant major depressive disorder and assisted dying. <i>J Med Ethics</i> 2015;41(8), 577-83. doi:10.1136/medethics-2014-102458.                                                                         | Not a CPG |
| Schulte-Korne G, Krick K. In reply. <i>Dtsch Arztebl Int</i> 2014;111(18):330. doi:10.3238/arztebl.2014.0330c.                                                                                                                                  | Not a CPG |
| Tomba E, Fava GA. Treatment selection in depression: the role of clinical judgment. <i>Psychiatr Clin North Am</i> 2012;35(1):87-98. doi:10.1016/j.psc.2011.11.003.                                                                             | Not a CPG |
| Treuer T, Liu C-Y, Salazar G, et al. Use of antidepressants in the treatment of depression in Asia: guidelines, clinical evidence, and experience revisited. <i>Asia Pac Psychiatry</i> 2013;5(4):219-30. doi:10.1111/appy.12090.               | Not a CPG |
| Tundo A, Calabrese JR, Proietti L, et al. Short-term antidepressant treatment of bipolar depression: are ISBD recommendations useful in clinical practice? <i>J Affect Disord</i> 2015;171:155-60. doi:10.1016/j.jad.2014.09.019.               | Not a CPG |
| Van Avendonk M, van Weel-Baumgarten E, van der Weele G, et al. Summary of the Dutch College of General Practitioners' practice guideline "Depression". <i>Ned Tijdschr Geneeskd</i> 2012;156(38):A5101.                                         | Not a CPG |
| Vinberg M, Levinsen MF, Kessing LV. Treatment-resistant                                                                                                                                                                                         | Not a CPG |



|                                                                                                                                                                                                                                                                                           |           |
|-------------------------------------------------------------------------------------------------------------------------------------------------------------------------------------------------------------------------------------------------------------------------------------------|-----------|
| depression is treatable. <i>Ugeskr Laeger</i> 2011;173(9):651-4.                                                                                                                                                                                                                          |           |
| Wang HR, Bahk WM, Park YM, et al. Korean medication algorithm for depressive disorder: comparisons with other treatment guidelines. <i>Psychiatry Investig</i> 2014;11(1):1-11. doi:10.4306/pi.2014.11.1.1.                                                                               | Not a CPG |
| Won E, Park SC, Han KM, et al. Evidence-based, pharmacological treatment guideline for depression in Korea, revised edition. <i>J Korean Med Sci</i> 2014;29(4):468-84. doi:10.3346/jkms.2014.29.4.468.                                                                                   | Not a CPG |
| Xiang YT, Hu C, Wang G, et al. Prescribing patterns of antidepressants, antipsychotics and mood stabilizers in bipolar patients misdiagnosed with major depressive disorder in China. <i>Hum Psychopharmacol</i> 2012;27(6):626-31. doi:10.1002/hup.2262.                                 | Not a CPG |
| Yang J, Han C, Yoon HK, et al. Experiences and barriers to implementation of clinical practice guideline for depression in Korea. <i>BMC Psychiatry</i> 2013;13:150. doi:10.1186/1471244X-13 - 150.                                                                                       | Not a CPG |
| Zimmerman M. Symptom severity and guideline-based treatment recommendations for depressed patients: implications of DSM-5's potential recommendation of the PHQ-9 as the measure of choice for depression severity. <i>Psychother Psychosom</i> 2012;81(6):329-32. doi:10.1159/000342262. | Not a CPG |
| Zimmerman M, Martinez JH, Friedman M, et al. How can we use depression severity to guide treatment selection when measures of depression categorize patients differently? <i>J Clin Psychiatry</i> 2012;73(10):1287-91. doi:10.4088/JCP.12m07775.                                         | Not a CPG |
| Malhi GS, Outhred T, Hamilton A, et al. Royal Australian and New Zealand College of Psychiatrists clinical practice guidelines for mood disorders: major depression summary. <i>Med J Aust</i> 2018;208(4):175-80. doi:10.5694/mja17.00659.                                               | Not a CPG |
| Evidence-Based Clinical Practice Guidelines for Depression in Adults on Traditional Korean Medicine; 2016.                                                                                                                                                                                | Not found |
| S3-Leitlinie/Nationale Versorgungs Leitlinie Unipolare Depression; 2015. In German.                                                                                                                                                                                                       | Language  |
| Depression. Adapted Evidence-based Guideline. Ucraina; 2014 - ^enpecia. AganTOBaHaKaH́nHaHacTaHOBa. In Ukrainian.                                                                                                                                                                         | Language  |

|                                                                                                                                                                                                                                                                                                                                                                    |                           |
|--------------------------------------------------------------------------------------------------------------------------------------------------------------------------------------------------------------------------------------------------------------------------------------------------------------------------------------------------------------------|---------------------------|
| [Depressive Disorder. <i>Depressie (M44)</i> ]; 2012. In Dutch.                                                                                                                                                                                                                                                                                                    | Language                  |
| Herrmann M, Gensichen J. Guidelines in general practice: the example depression. <i>Psychiatrie</i> 2015;66:119-24.                                                                                                                                                                                                                                                | Language                  |
| Kuroki T, Tanaka T. [Threshold of application of antidepressant drugs for treatment of depressive disorder]. <i>Seishin Shinkeigaku Zasshi</i> 2015;117(4):269-76. In Japanese.                                                                                                                                                                                    | Language                  |
| Semba J. [Proper use of novel antidepressants in psychiatric clinical practice]. <i>Seishin Shinkeigaku Zasshi</i> . 2014;116(2):138-143. In Japanese.                                                                                                                                                                                                             | Language                  |
| Yamada K. [Evidence of treatment for depressive episodes of bipolar disorder]. <i>Seishin Shinkeigaku Zasshi</i> 2011;113(9):873-9. In Japanese.                                                                                                                                                                                                                   | Language                  |
| Siu AL, US Preventive Services Task Force (USPSTF). Screening for depression in adults: US Preventive Services Task Force recommendation statement. <i>JAMA</i> 2016;315(4):380-7. doi:10.1001/jama.2015.18392.                                                                                                                                                    | Language                  |
| Thase ME. Recommendations for screening for depression in adults. <i>JAMA</i> 2016;315(4):349-50. doi:10.1001/jama.2015.18406.                                                                                                                                                                                                                                     | Language                  |
| Patejuk-Mazurek I. Selected antidepressants and anxiolytics: practical guidelines and case studies. <i>Psychiatria</i> 2017;14(3):135-42.                                                                                                                                                                                                                          | Language                  |
| Clinical Practice Guidelines: Depression in Adolescents and Young Adults. Melbourne, Australia: NLMCRC; 2015.                                                                                                                                                                                                                                                      | Focused on special groups |
| Rayner L, Price A, Hotopf M, et al. The development of evidence-based European guidelines on the management of depression in palliative cancer care. <i>Eur J Cancer</i> 2011;47(5):702-12. doi:10.1016/j.ejca.2010.11.027.                                                                                                                                        | Focused on special groups |
| World Health Organization. Pharmacological Interventions (Antidepressants) for 433 People with Dementia Who Have Associated Depression. Geneva, Switzerland: WHO; 2015. Available from: <a href="https://www.who.int/mental_health/mhgap/evidence/dementia/q4/en/">https://www.who.int/mental_health/mhgap/evidence/dementia/q4/en/</a> . Accessed August 1, 2017. | Focused on special groups |
| Colquhoun DM, Bunker SJ, Clarke DM, et al. Screening, referral and treatment for depression in patients with coronary heart disease. <i>Med J Aust</i> 2013;198(9):483-4. doi:10.5694/mja13.10153.                                                                                                                                                                 | Focused on special groups |
| Galician Health Technology Assessment Agency. Clinical                                                                                                                                                                                                                                                                                                             | Outdated                  |

|                                                                                                                                                                                                                                                                                                                                                                             |                          |
|-----------------------------------------------------------------------------------------------------------------------------------------------------------------------------------------------------------------------------------------------------------------------------------------------------------------------------------------------------------------------------|--------------------------|
| Practice Guideline on the Management of Major Depression in Adults. Santiago de Compostela, Spain: Galician Health Technology Assessment Agency; 2008.                                                                                                                                                                                                                      |                          |
| National Collaborating Centre for Mental Health (UK). Depression. The Treatment and Management of Depression in Adults. Leicester, UK: British Psychological Society; 2010.                                                                                                                                                                                                 | Outdated                 |
| Lam RW, Parikh SV, Michalak EE, et al. Canadian Network for Mood and Anxiety Treatments (CANMAT) consensus recommendations for functional outcomes in major depressive disorder. <i>Ann Clin Psychiatr</i> 2015;27(2):142-9.                                                                                                                                                | Outdated                 |
| Agency for Healthcare Research and Quality. Detecting Depression in Older Adults with Dementia. Ann Arbor, MI: University of Michigan Health System; [s.d].                                                                                                                                                                                                                 | Outdated                 |
| Adult Depression in Primary Care. Bloomington, MN: ICSI; 2013.                                                                                                                                                                                                                                                                                                              | Outdated                 |
| Galletly C, Castle D, Dark F, et al. Royal Australian and New Zealand College of Psychiatrists clinical practice guidelines for the management of schizophrenia and related disorders. <i>Aust N Z J Psychiatry</i> 2016;50(5):410-72. doi:10.1177/0004867416641195.                                                                                                        | Outdated                 |
| Karyotaki E, Smit Y, Cuijpers P, et al. The Long-term Efficacy of Psychotherapy, Alone or in Combination with Antidepressants, in the Treatment of Adult Major Depression. Good Clinical Practice (GCP). Brussels, Belgium: Belgian psychotherapy Health Care Knowledge Centre (KCE); 2014. Available from: <a href="#">pression_Report_0.pdf</a> . Accessed June 30, 2017. | Focused on psychotherapy |
| Goracci A, Forgione RN, De Giorgi R, Coluccia A, Cuomo S, Fagiolini A. Practical guidance for prescribing trazodone extended-release in major depression. <i>Expert Opin Pharmacother</i> . 2016;17(3):433-41. doi:10.1517/14656566.2016.1133587                                                                                                                            | Subject matter           |
